# Supplementary material for: Landscape fragmentation and pollinator movement within agricultural environments: a modelling framework for exploring foraging and movement ecology
Source: PubMed Central journal article supplement (PMC3940622; doi:10.7717/peerj.269), 2014-02-27
Supplement: peerj-02-269-s010.pdf [file peerj-02-269-s010.pdf]

SUPPLEMENTARY INFORMATION

TABLES OF POST-HOC TEST RESULTS

All tables report Z values for Tukey tests, with: '\*'  $p < 0.05$ , '\*\*'  $p < 0.005$ , '\*\*\*'  $p < 0.001$

MODEL 1: EFFECTS OF MOVEMENT CHOICE

Pairwise comparisons of probability of moving forwards

maximum distance from nest

|       | 0.25      | 0.375     | 0.5       | 0.625     | 0.75      |
|-------|-----------|-----------|-----------|-----------|-----------|
| 0.375 | *3.077    |           |           |           |           |
| 0.5   | ***12.822 | ***9.745  |           |           |           |
| 0.625 | ***22.381 | ***19.304 | ***9.560  |           |           |
| 0.75  | ***34.218 | ***31.141 | ***21.396 | ***11.836 |           |
| 0.875 | ***74.132 | ***71.055 | ***61.31  | ***51.751 | ***39.914 |

number of habitat changes

|       | 0.25   | 0.375  | 0.5    | 0.625   | 0.75  |
|-------|--------|--------|--------|---------|-------|
| 0.375 | 1.313  |        |        |         |       |
| 0.5   | -0.103 | -1.415 |        |         |       |
| 0.625 | 2.552  | 1.239  | 2.654  |         |       |
| 0.75  | -0.426 | -1.739 | -0.323 | *-2.978 |       |
| 0.875 | 1.759  | 0.447  | 1.892  | -0.792  | 2.185 |

proportion of time spent in wild

|       | 0.25      | 0.375     | 0.5       | 0.625     | 0.75   |
|-------|-----------|-----------|-----------|-----------|--------|
| 0.375 | -1.239    |           |           |           |        |
| 0.5   | *-3.109   | -1.87     |           |           |        |
| 0.625 | -2.497    | -1.258    | 0.612     |           |        |
| 0.75  | ***-6.347 | ***-5.108 | *-3.238   | ** -3.850 |        |
| 0.875 | ***-7.894 | ***-6.655 | ***-4.785 | ***-5.397 | -1.547 |

MODEL 2: EFFECTS OF ALTERING THE LIKELIHOOD OF SWITCHING PREFERENCE  
 Pairwise comparisons of probability of switching

maximum distance from nest

|            | 0.00513823 | 0.00770735 | 0.011561  | 0.0173415 | 0.0260123 | 0.0390184 | 0.0585277 | 0.0877915 | 0.131687 | 0.197531 | 0.296296 | 0.444444 | 0.666667 |
|------------|------------|------------|-----------|-----------|-----------|-----------|-----------|-----------|----------|----------|----------|----------|----------|
| 0.00770735 | 3.076      |            |           |           |           |           |           |           |          |          |          |          |          |
| 0.011561   | ***4.955   | 1.879      |           |           |           |           |           |           |          |          |          |          |          |
| 0.0173415  | ***4.949   | 1.873      | -0.006    |           |           |           |           |           |          |          |          |          |          |
| 0.0260123  | ***7.361   | **4.285    | 2.406     | 2.412     |           |           |           |           |          |          |          |          |          |
| 0.0390184  | ***6.992   | ***3.916   | 2.038     | 2.044     | -0.368    |           |           |           |          |          |          |          |          |
| 0.0585277  | ***8.869   | ***5.793   | **3.914   | **3.92    | 1.508     | 1.876     |           |           |          |          |          |          |          |
| 0.0877915  | ***9.298   | ***6.222   | **4.343   | **4.349   | 1.937     | 2.305     | 0.429     |           |          |          |          |          |          |
| 0.131687   | ***9.096   | ***6.019   | **4.141   | **4.147   | 1.735     | 2.103     | 0.227     | -0.202    |          |          |          |          |          |
| 0.197531   | ***12.57   | ***9.494   | **7.615   | ***7.621  | ***5.209  | ***5.577  | *3.701    | 3.272     | *3.474   |          |          |          |          |
| 0.296296   | ***12.878  | ***9.802   | **7.923   | **7.93    | ***5.518  | ***5.886  | **4.01    | *3.580    | *3.783   | 0.308    |          |          |          |
| 0.444444   | ***12.844  | ***9.768   | **7.889   | ***7.895  | ***5.483  | ***5.851  | ***3.975  | *3.546    | *3.748   | 0.274    | -0.034   |          |          |
| 0.666667   | ***16.013  | ***12.937  | ***11.059 | ***11.065 | ***8.653  | ***9.021  | ***7.145  | ***6.716  | ***6.918 | *3.443   | 3.135    | 3.170    |          |
| 1          | ***14.44   | ***11.364  | ***9.486  | ***9.492  | ***7.08   | ***7.448  | ***5.572  | ***5.143  | ***5.345 | 1.87     | 1.562    | 1.596    | -1.573   |

number of habitat changes

|            | 0.00513823 | 0.00770735 | 0.011561  | 0.0173415 | 0.0260123 | 0.0390184 | 0.0585277 | 0.0877915 | 0.131687  | 0.197531  | 0.296296  | 0.444444  | 0.666667  |
|------------|------------|------------|-----------|-----------|-----------|-----------|-----------|-----------|-----------|-----------|-----------|-----------|-----------|
| 0.00770735 | 1.344      |            |           |           |           |           |           |           |           |           |           |           |           |
| 0.011561   | 2.824      | 1.480      |           |           |           |           |           |           |           |           |           |           |           |
| 0.0173415  | ***4.692   | 3.348      | 1.868     |           |           |           |           |           |           |           |           |           |           |
| 0.0260123  | ***7.373   | ***6.030   | ***4.550  | 2.681     |           |           |           |           |           |           |           |           |           |
| 0.0390184  | ***10.752  | ***9.409   | ***7.929  | ***6.060  | *3.379    |           |           |           |           |           |           |           |           |
| 0.0585277  | ***14.712  | ***13.368  | ***11.888 | ***10.020 | ***7.338  | **3.959   |           |           |           |           |           |           |           |
| 0.0877915  | ***20.087  | ***18.743  | ***17.263 | ***15.395 | ***12.713 | ***9.334  | ***5.375  |           |           |           |           |           |           |
| 0.131687   | ***26.108  | ***24.764  | ***23.284 | ***21.416 | ***18.735 | ***15.356 | ***11.396 | ***6.021  |           |           |           |           |           |
| 0.197531   | ***33.141  | ***31.797  | ***30.317 | ***28.449 | ***25.767 | ***22.388 | ***18.429 | ***13.054 | ***7.033  |           |           |           |           |
| 0.296296   | ***41.010  | ***39.666  | ***38.186 | ***36.318 | ***33.636 | ***30.257 | ***26.298 | ***20.923 | ***14.901 | ***7.869  |           |           |           |
| 0.444444   | ***49.159  | ***47.815  | ***46.335 | ***44.467 | ***41.786 | ***38.407 | ***34.447 | ***29.072 | ***23.051 | ***16.018 | ***8.149  |           |           |
| 0.666667   | ***64.647  | ***63.303  | ***61.823 | ***59.955 | ***57.273 | ***53.894 | ***49.935 | ***44.560 | ***38.539 | ***31.506 | ***23.637 | ***15.488 |           |
| 1          | ***77.903  | ***76.559  | ***75.079 | ***73.211 | ***70.530 | ***67.151 | ***63.191 | ***57.816 | ***51.795 | ***44.762 | ***36.893 | ***28.744 | ***13.256 |

proportion of time spent in wild

|            | 0.00513823 | 0.00770735 | 0.011561   | 0.0173415 | 0.0260123 | 0.0390184 | 0.0585277 | 0.0877915 | 0.131687 | 0.197531 | 0.296296 | 0.444444 | 0.666667 |
|------------|------------|------------|------------|-----------|-----------|-----------|-----------|-----------|----------|----------|----------|----------|----------|
| 0.00770735 | ***-27.188 |            |            |           |           |           |           |           |          |          |          |          |          |
| 0.011561   | ***-27.021 | 0.167      |            |           |           |           |           |           |          |          |          |          |          |
| 0.0173415  | ***-41.304 | ***-14.116 | ***-14.283 |           |           |           |           |           |          |          |          |          |          |
| 0.0260123  | ***-44.825 | ***-17.637 | ***-17.804 | *-3.521   |           |           |           |           |          |          |          |          |          |
| 0.0390184  | ***-44.412 | ***-17.224 | ***-17.391 | -3.108    | 0.413     |           |           |           |          |          |          |          |          |
| 0.0585277  | ***-46.54  | ***-19.352 | ***-19.518 | ***-5.235 | -1.715    | -2.128    |           |           |          |          |          |          |          |
| 0.0877915  | ***-46.736 | ***-19.548 | ***-19.715 | ***-5.432 | -1.911    | -2.324    | -0.196    |           |          |          |          |          |          |
| 0.131687   | ***-47.876 | ***-20.688 | ***-20.855 | ***-6.572 | -3.051    | *-3.464   | -1.337    | -1.140    |          |          |          |          |          |
| 0.197531   | ***-48.370 | ***-21.182 | ***-21.348 | ***-7.065 | *-3.545   | **-3.958  | -1.830    | -1.634    | -0.493   |          |          |          |          |
| 0.296296   | ***-48.553 | ***-21.366 | ***-21.532 | ***-7.249 | *-3.728   | ** -4.141 | -2.014    | -1.817    | -0.677   | -0.184   |          |          |          |
| 0.444444   | ***-49.121 | ***-21.933 | ***-22.099 | ***-7.817 | ** -4.296 | ***-4.709 | -2.581    | -2.385    | -1.245   | -0.751   | -0.567   |          |          |
| 0.666667   | ***-48.476 | ***-21.288 | ***-21.455 | ***-7.172 | *-3.651   | ** -4.064 | -1.936    | -1.740    | -0.600   | -0.106   | 0.077    | 0.645    |          |
| 1          | ***-48.101 | ***-20.913 | ***-21.080 | ***-6.797 | -3.276    | *-3.689   | -1.561    | -1.365    | -0.225   | 0.269    | 0.453    | 1.020    | 0.375    |

MODEL 3: EFFECTS OF INCLUDING SET-ASIDES  
 Pairwise comparisons of number of set-asides

maximum distance from nest

|    | 0        | 5     | 10    | 15     | 20    | 25     | 30     | 35     | 40     | 45     |
|----|----------|-------|-------|--------|-------|--------|--------|--------|--------|--------|
| 5  | ***5.259 |       |       |        |       |        |        |        |        |        |
| 10 | ***5.279 | 0.020 |       |        |       |        |        |        |        |        |
| 15 | ***5.786 | 0.527 | 0.507 |        |       |        |        |        |        |        |
| 20 | ***5.630 | 0.370 | 0.351 | -0.156 |       |        |        |        |        |        |
| 25 | ***6.242 | 0.983 | 0.963 | 0.457  | 0.613 |        |        |        |        |        |
| 30 | ***6.713 | 1.454 | 1.434 | 0.927  | 1.083 | 0.470  |        |        |        |        |
| 35 | ***6.805 | 1.545 | 1.526 | 1.019  | 1.175 | 0.562  | 0.092  |        |        |        |
| 40 | ***6.483 | 1.224 | 1.204 | 0.697  | 0.853 | 0.241  | -0.230 | -0.322 |        |        |
| 45 | ***6.225 | 0.966 | 0.946 | 0.439  | 0.596 | -0.017 | -0.488 | -0.579 | -0.258 |        |
| 50 | ***5.898 | 0.639 | 0.619 | 0.112  | 0.269 | -0.344 | -0.815 | -0.906 | -0.585 | -0.327 |

number of habitat changes

|    | 0         | 5         | 10        | 15        | 20        | 25        | 30       | 35       | 40       | 45     |
|----|-----------|-----------|-----------|-----------|-----------|-----------|----------|----------|----------|--------|
| 5  | -1.718    |           |           |           |           |           |          |          |          |        |
| 10 | **4.028   | -2.31     |           |           |           |           |          |          |          |        |
| 15 | ***7.149  | ***5.431  | -3.121    |           |           |           |          |          |          |        |
| 20 | ***9.222  | ***7.504  | ***5.194  | -2.073    |           |           |          |          |          |        |
| 25 | ***12.160 | ***10.442 | ***8.132  | ***5.012  | -2.938    |           |          |          |          |        |
| 30 | ***15.116 | ***13.398 | ***11.088 | ***7.967  | ***5.894  | -2.956    |          |          |          |        |
| 35 | ***17.290 | ***15.572 | ***13.262 | ***10.141 | ***8.068  | ***5.130  | -2.174   |          |          |        |
| 40 | ***19.048 | ***17.330 | ***15.02  | ***11.899 | ***9.826  | ***6.887  | **3.932  | -1.758   |          |        |
| 45 | ***21.207 | ***19.489 | ***17.179 | ***14.058 | ***11.985 | ***9.047  | ***6.091 | **3.917  | -2.159   |        |
| 50 | ***23.596 | ***21.878 | ***19.568 | ***16.447 | ***14.374 | ***11.436 | ***8.480 | ***6.306 | ***4.548 | -2.389 |

proportion of time spent in wild

|    | 0         | 5         | 10        | 15        | 20        | 25        | 30        | 35        | 40       | 45       |
|----|-----------|-----------|-----------|-----------|-----------|-----------|-----------|-----------|----------|----------|
| 5  | ***5.340  |           |           |           |           |           |           |           |          |          |
| 10 | ***8.874  | *3.534    |           |           |           |           |           |           |          |          |
| 15 | ***13.093 | ***7.753  | **4.218   |           |           |           |           |           |          |          |
| 20 | ***17.149 | ***11.808 | ***8.274  | **4.056   |           |           |           |           |          |          |
| 25 | ***21.430 | ***16.090 | ***12.556 | ***8.337  | ***4.281  |           |           |           |          |          |
| 30 | ***26.322 | ***20.982 | ***17.448 | ***13.229 | ***9.173  | ***4.892  |           |           |          |          |
| 35 | ***30.667 | ***25.327 | ***21.793 | ***17.575 | ***13.519 | ***9.237  | ***4.345  |           |          |          |
| 40 | ***33.973 | ***28.633 | ***25.099 | ***20.880 | ***16.824 | ***12.543 | ***7.651  | *3.306    |          |          |
| 45 | ***36.792 | ***31.452 | ***27.918 | ***23.699 | ***19.643 | ***15.362 | ***10.470 | ***6.125  | *2.819   |          |
| 50 | ***41.079 | ***35.738 | ***32.204 | ***27.986 | ***23.930 | ***19.648 | ***14.757 | ***10.411 | ***7.106 | ***4.287 |

MODEL 3a: EFFECTS OF INCLUDING SET-ASIDES WHEN EES DO NOT CHANGE HABITATS  
 Pairwise comparisons of number of set-asides

maximum distance from nest

|    | 0         | 5         | 10        | 15        | 20        | 25        | 30       | 35       | 40     | 45    |
|----|-----------|-----------|-----------|-----------|-----------|-----------|----------|----------|--------|-------|
| 5  | 2.198     |           |           |           |           |           |          |          |        |       |
| 10 | ***5.156  | 2.958     |           |           |           |           |          |          |        |       |
| 15 | ***7.728  | ***5.530  | 2.572     |           |           |           |          |          |        |       |
| 20 | ***10.214 | ***8.017  | ***5.059  | 2.486     |           |           |          |          |        |       |
| 25 | ***12.164 | ***9.967  | ***7.008  | ***4.436  | 1.950     |           |          |          |        |       |
| 30 | ***15.346 | ***13.148 | ***10.19  | ***7.618  | ***5.132  | 3.182     |          |          |        |       |
| 35 | ***16.760 | ***14.562 | ***11.604 | ***9.032  | ***6.546  | ***4.596  | 1.414    |          |        |       |
| 40 | ***19.233 | ***17.035 | ***14.077 | ***11.505 | ***9.018  | ***7.069  | ***3.887 | 2.473    |        |       |
| 45 | ***21.301 | ***19.104 | ***16.145 | ***13.573 | ***11.087 | ***9.137  | ***5.955 | ***4.541 | 2.068  |       |
| 50 | ***22.699 | ***20.501 | ***17.543 | ***14.971 | ***12.484 | ***10.534 | ***7.353 | ***5.939 | *3.466 | 1.397 |

MODEL4: EFFECTS OF REMOVING HEDGES  
 Pairwise comparisons of number of hedges removed

maximum distance from nest

|    | 0        | 4      | 8         | 12     | 16     | 20     | 24     | 28     | 32     | 36     |
|----|----------|--------|-----------|--------|--------|--------|--------|--------|--------|--------|
| 4  |          |        |           |        |        |        |        |        |        |        |
| 8  | **3.913  |        |           |        |        |        |        |        |        |        |
| 12 | ***5.785 | 1.872  |           |        |        |        |        |        |        |        |
| 16 | 1.389    | -2.524 | ***-4.396 |        |        |        |        |        |        |        |
| 20 | *3.425   | -0.487 | -2.360    | 2.036  |        |        |        |        |        |        |
| 24 | *3.531   | -0.381 | -2.254    | 2.142  | 0.106  |        |        |        |        |        |
| 28 | 3.051    | -0.862 | -2.734    | 1.662  | -0.374 | -0.480 |        |        |        |        |
| 32 | 2.081    | -1.832 | **3.704   | 0.692  | -1.345 | -1.451 | -0.970 |        |        |        |
| 36 | 1.359    | -2.554 | ***4.426  | -0.030 | -2.066 | -2.172 | -1.692 | -0.722 |        |        |
| 40 | ***4.825 | 0.912  | -0.960    | *3.436 | 1.400  | 1.294  | 1.774  | 2.744  | *3.466 |        |
|    | ***3.886 | -0.027 | -1.899    | 2.496  | 0.460  | 0.354  | 0.835  | 1.805  | 2.526  | -0.940 |

number of habitat changes

|    | 0         | 4         | 8         | 12      | 16        | 20      | 24     | 28      | 32     | 36     |
|----|-----------|-----------|-----------|---------|-----------|---------|--------|---------|--------|--------|
| 4  |           |           |           |         |           |         |        |         |        |        |
| 8  | -2.067    |           |           |         |           |         |        |         |        |        |
| 12 | -1.08     | 0.987     |           |         |           |         |        |         |        |        |
| 16 | -3.094    | -1.027    | -2.015    |         |           |         |        |         |        |        |
| 20 | -2.466    | -0.399    | -1.386    | 0.628   |           |         |        |         |        |        |
| 24 | -2.710    | -0.643    | -1.630    | 0.384   | -0.244    |         |        |         |        |        |
| 28 | ***-4.601 | -2.534    | *-3.521   | -1.507  | -2.135    | -1.891  |        |         |        |        |
| 32 | *-3.603   | -1.537    | -2.524    | -0.509  | -1.138    | -0.893  | 0.998  |         |        |        |
| 36 | ***-5.741 | *-3.675   | ***-4.662 | -2.647  | *-3.276   | -3.032  | -1.141 | -2.138  |        |        |
| 40 | ***-5.782 | **3.715   | ***-4.702 | -2.688  | *-3.316   | -3.072  | -1.181 | -2.178  | -0.040 |        |
|    | ***-6.953 | ***-4.887 | ***-5.874 | **3.859 | ***-4.488 | **4.244 | -2.353 | *-3.350 | -1.212 | -1.172 |

proportion of time spent in wild

|    | 0         | 4         | 8         | 12     | 16      | 20     | 24     | 28     | 32     | 36     |
|----|-----------|-----------|-----------|--------|---------|--------|--------|--------|--------|--------|
| 4  |           |           |           |        |         |        |        |        |        |        |
| 8  | -0.938    |           |           |        |         |        |        |        |        |        |
| 12 | -0.924    | 0.013     |           |        |         |        |        |        |        |        |
| 16 | -2.809    | -1.872    | -1.885    |        |         |        |        |        |        |        |
| 20 | -2.02     | -1.082    | -1.096    | 0.789  |         |        |        |        |        |        |
| 24 | -2.857    | -1.919    | -1.932    | -0.047 | -0.837  |        |        |        |        |        |
| 28 | -3.131    | -2.193    | -2.206    | -0.321 | -1.111  | -0.274 |        |        |        |        |
| 32 | -2.668    | -1.73     | -1.744    | 0.141  | -0.648  | 0.189  | 0.462  |        |        |        |
| 36 | ***-4.659 | **3.722   | **3.735   | -1.850 | -2.639  | -1.803 | -1.529 | -1.991 |        |        |
| 40 | *-3.640   | -2.702    | -2.715    | -0.830 | -1.620  | -0.783 | -0.509 | -0.972 | 1.020  |        |
|    | ***-5.416 | ***-4.478 | ***-4.491 | -2.606 | *-3.396 | -2.559 | -2.285 | -2.748 | -0.756 | -1.776 |

MODEL4a: EFFECTS OF REMOVING HEDGES WHEN BEES DO NOT CHANGE HABITAT  
 Pairwise comparisons of number of hedges removed

maximum distance from nest

|    | 0      | 4      | 8      | 12     | 16    | 20     | 24    | 28     | 32    | 36     |
|----|--------|--------|--------|--------|-------|--------|-------|--------|-------|--------|
| 4  |        |        |        |        |       |        |       |        |       |        |
| 8  | 1.086  |        |        |        |       |        |       |        |       |        |
| 12 | 1.687  | 0.601  |        |        |       |        |       |        |       |        |
| 16 | 0.575  | -0.512 | -1.112 |        |       |        |       |        |       |        |
| 20 | -0.072 | -1.159 | -1.759 | -0.647 |       |        |       |        |       |        |
| 24 | 1.757  | 0.671  | 0.070  | 1.182  | 1.829 |        |       |        |       |        |
| 28 | 1.672  | 0.585  | -0.015 | 1.097  | 1.744 | -0.085 |       |        |       |        |
| 32 | 2.595  | 1.509  | 0.908  | 2.021  | 2.668 | 0.838  | 0.924 |        |       |        |
| 36 | 1.736  | 0.650  | 0.049  | 1.162  | 1.809 | -0.021 | 0.065 | -0.859 |       |        |
| 40 | 2.932  | 1.846  | 1.245  | 2.358  | 3.005 | 1.175  | 1.261 | 0.337  | 1.196 |        |
|    | 2.885  | 1.798  | 1.198  | 2.310  | 2.957 | 1.128  | 1.213 | 0.289  | 1.148 | -0.048 |
